# Supplementary material for: DFT study of furfural conversion on a Re/Pt bimetallic surface: synergetic effect on the promotion of hydrodeoxygenation
Source: Royal Society of Chemistry journal article supplement (doi:10.1039/c8cp07806h), 2019-01-01
Supplement: c8cp07806h1.pdf [file c8cp07806h1.pdf]

## Supporting information

### A DFT Study of Furfural Conversion on Re/Pt Bimetallic Surface: Synergetic Effect on the Promotion of Hydrodeoxygenation

*He Dong<sup>a</sup>, Ying Zheng<sup>ab\*</sup>, and P. Hu<sup>c\*</sup>*

*<sup>a</sup>Department of Chemical Engineering, University of New Brunswick, Fredericton, NB E3B 5A3 Canada*

*<sup>b</sup>School of Engineering, University of Edinburgh, The King's Buildings, Edinburgh EH9 3DW, United Kingdom*

*<sup>c</sup>School of Chemistry and Chemical Engineering, The Queen's University of Belfast, Belfast BT9 5AG, United Kingdom*

#### Table of content:

**Figure S1:** Adsorption of hydrogen atom on Re/Pt bimetallic system.

**Figure S2:** Mechanisms of furfural conversion to furfuryl alcohol.

**Figure S3:** Mechanism of successive hydrogenations of oxygen into water.

**Figure S4:** Mechanism of 2-methylfuran formation via direct cleavage of C-OH bond of furfuryl alcohol.

**Figure S5:** Mechanism of 2-methylfuran formation via the cleavage of C-O bond of alkoxide intermediate.

**Figure S6:** Mechanism of 2-methylfuran formation via the cleavage of C-OH bond of hydroxyalkyl intermediate.

**Figure S7:** Mechanism of 2-methylfuran formation via the direct cleavage of C-O bond of furfural.

**Figure S8:** Mechanism of furfural dehydrogenation.

**Figure S9:** Key steps of furfural hydrodeoxygenation reaction structures on Pt(111).

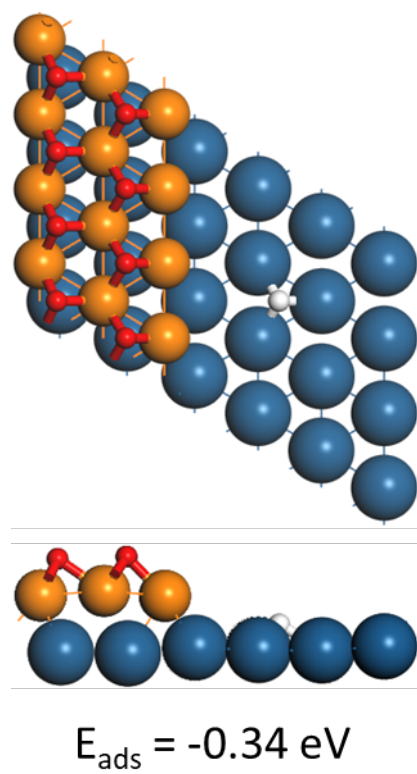

**Figure S1:** Adsorption of hydrogen atom on Re/Pt bimetallic system.

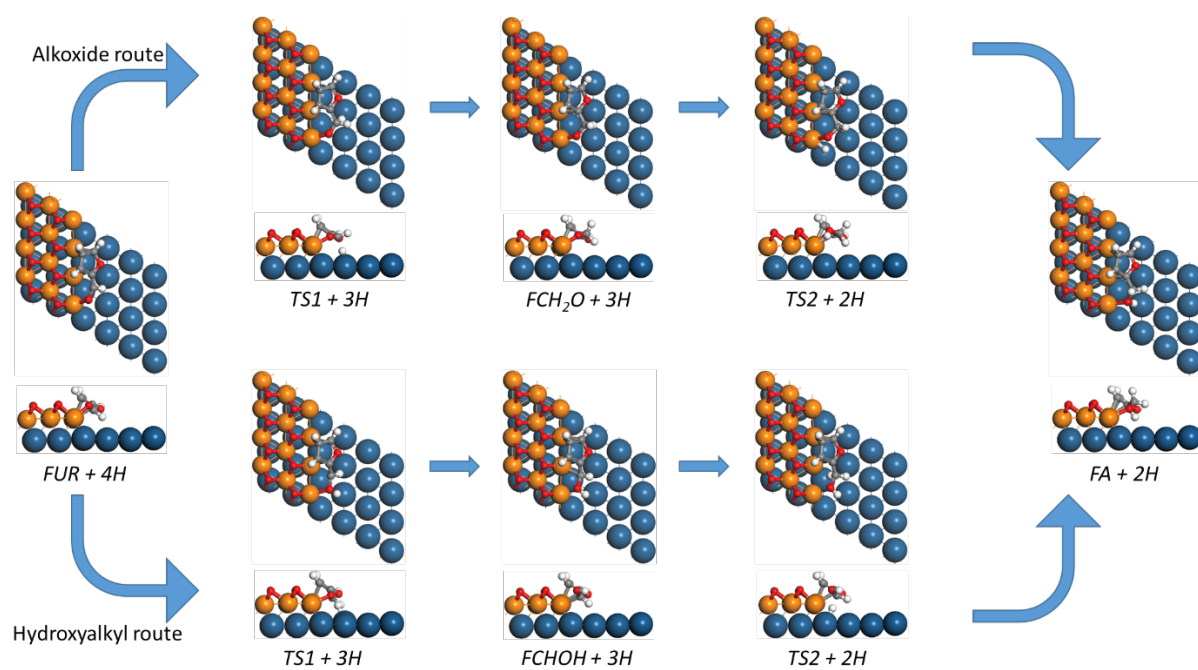

**Figure S2:** Mechanisms of furfural conversion to furfuryl alcohol.

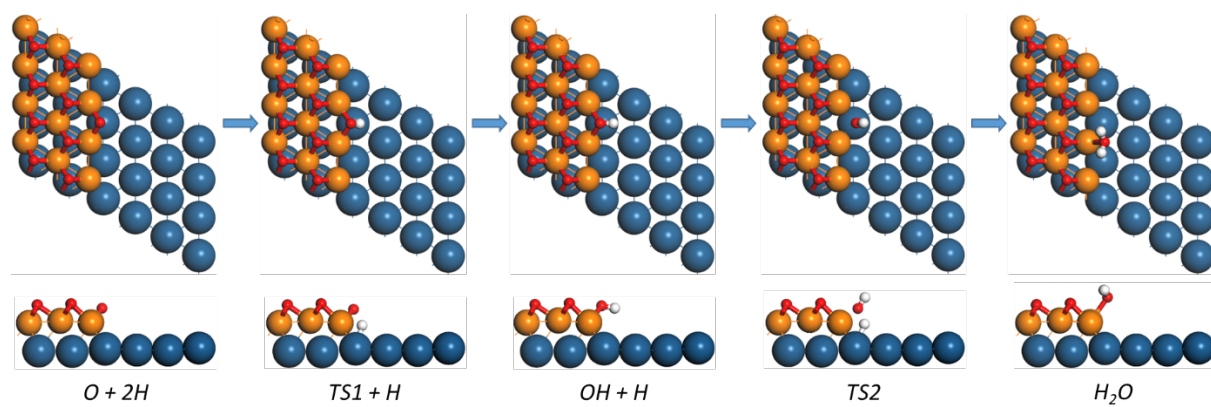

**Figure S3:** Mechanism of successive hydrogenations of oxygen into water.

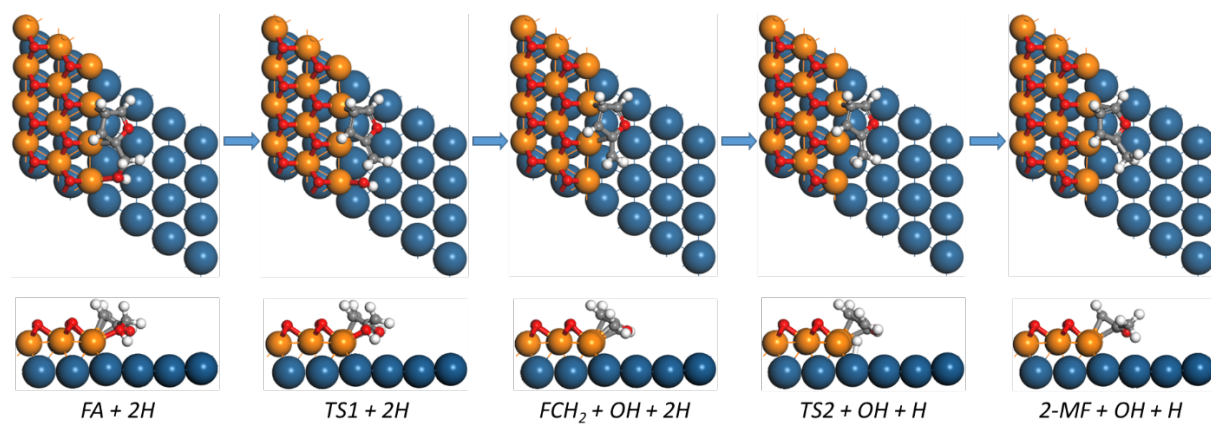

**Figure S4:** Mechanism of 2-methylfuran formation via direct cleavage of C-OH bond of furfuryl alcohol.

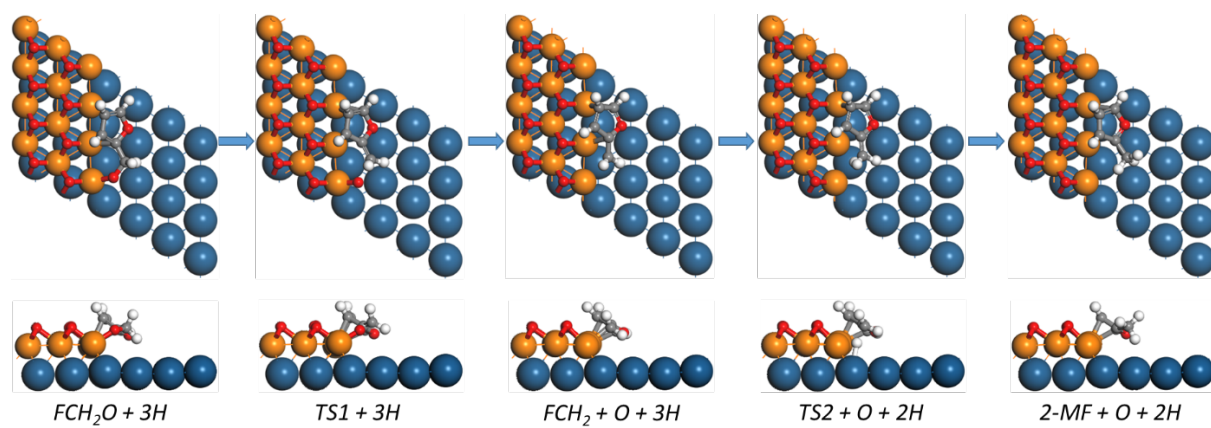

**Figure S5:** Mechanism of 2-methylfuran formation via the cleavage of C-O bond of alkoxide intermediate.

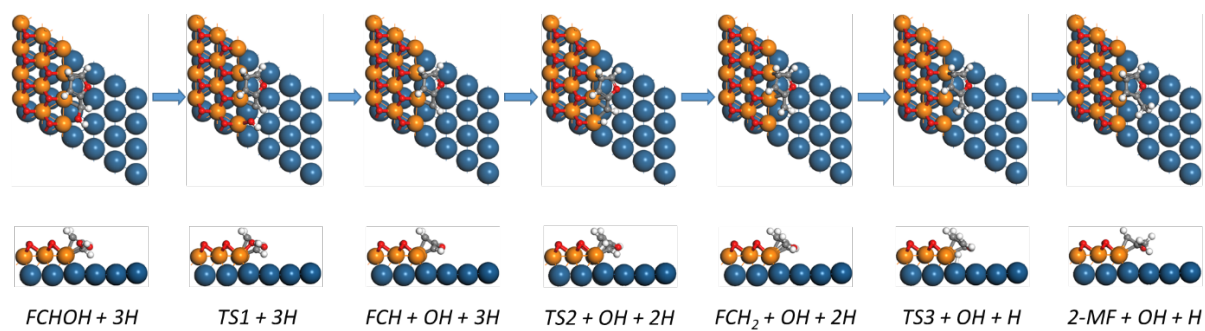

**Figure S6:** Mechanism of 2-methylfuran formation via the cleavage of C-OH bond of hydroxyalkyl intermediate.

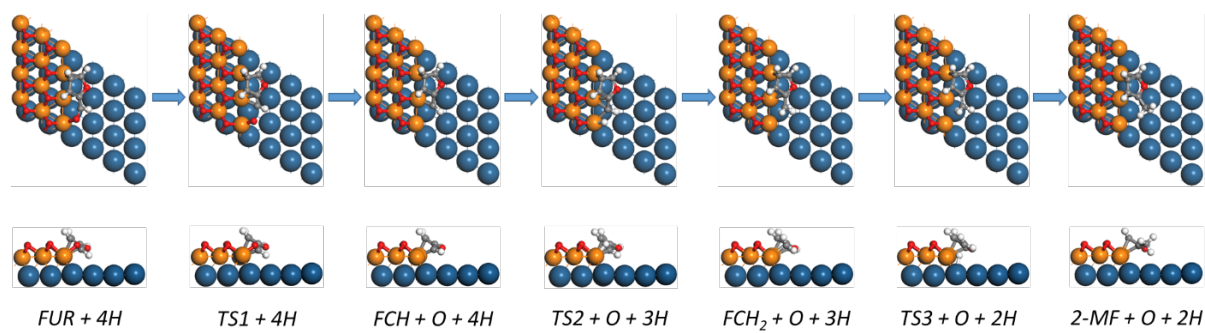

**Figure S7:** Mechanism of 2-methylfuran formation via the direct cleavage of C-O bond of furfural.



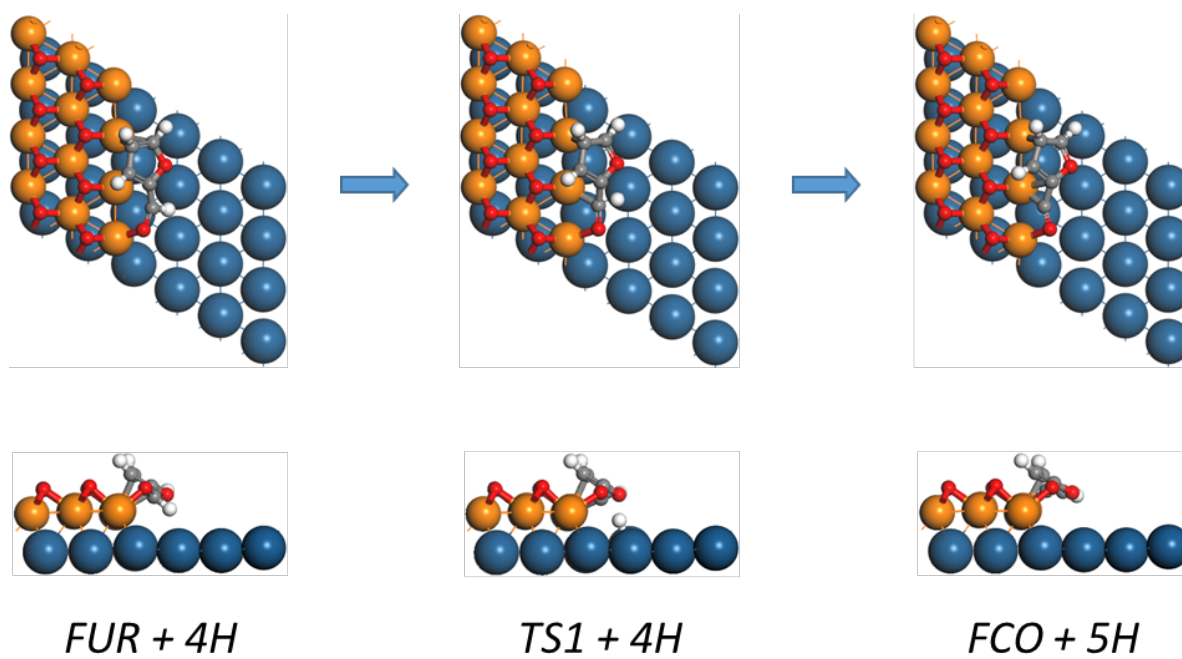

**Figure S8:** Mechanism of furfural dehydrogenation.

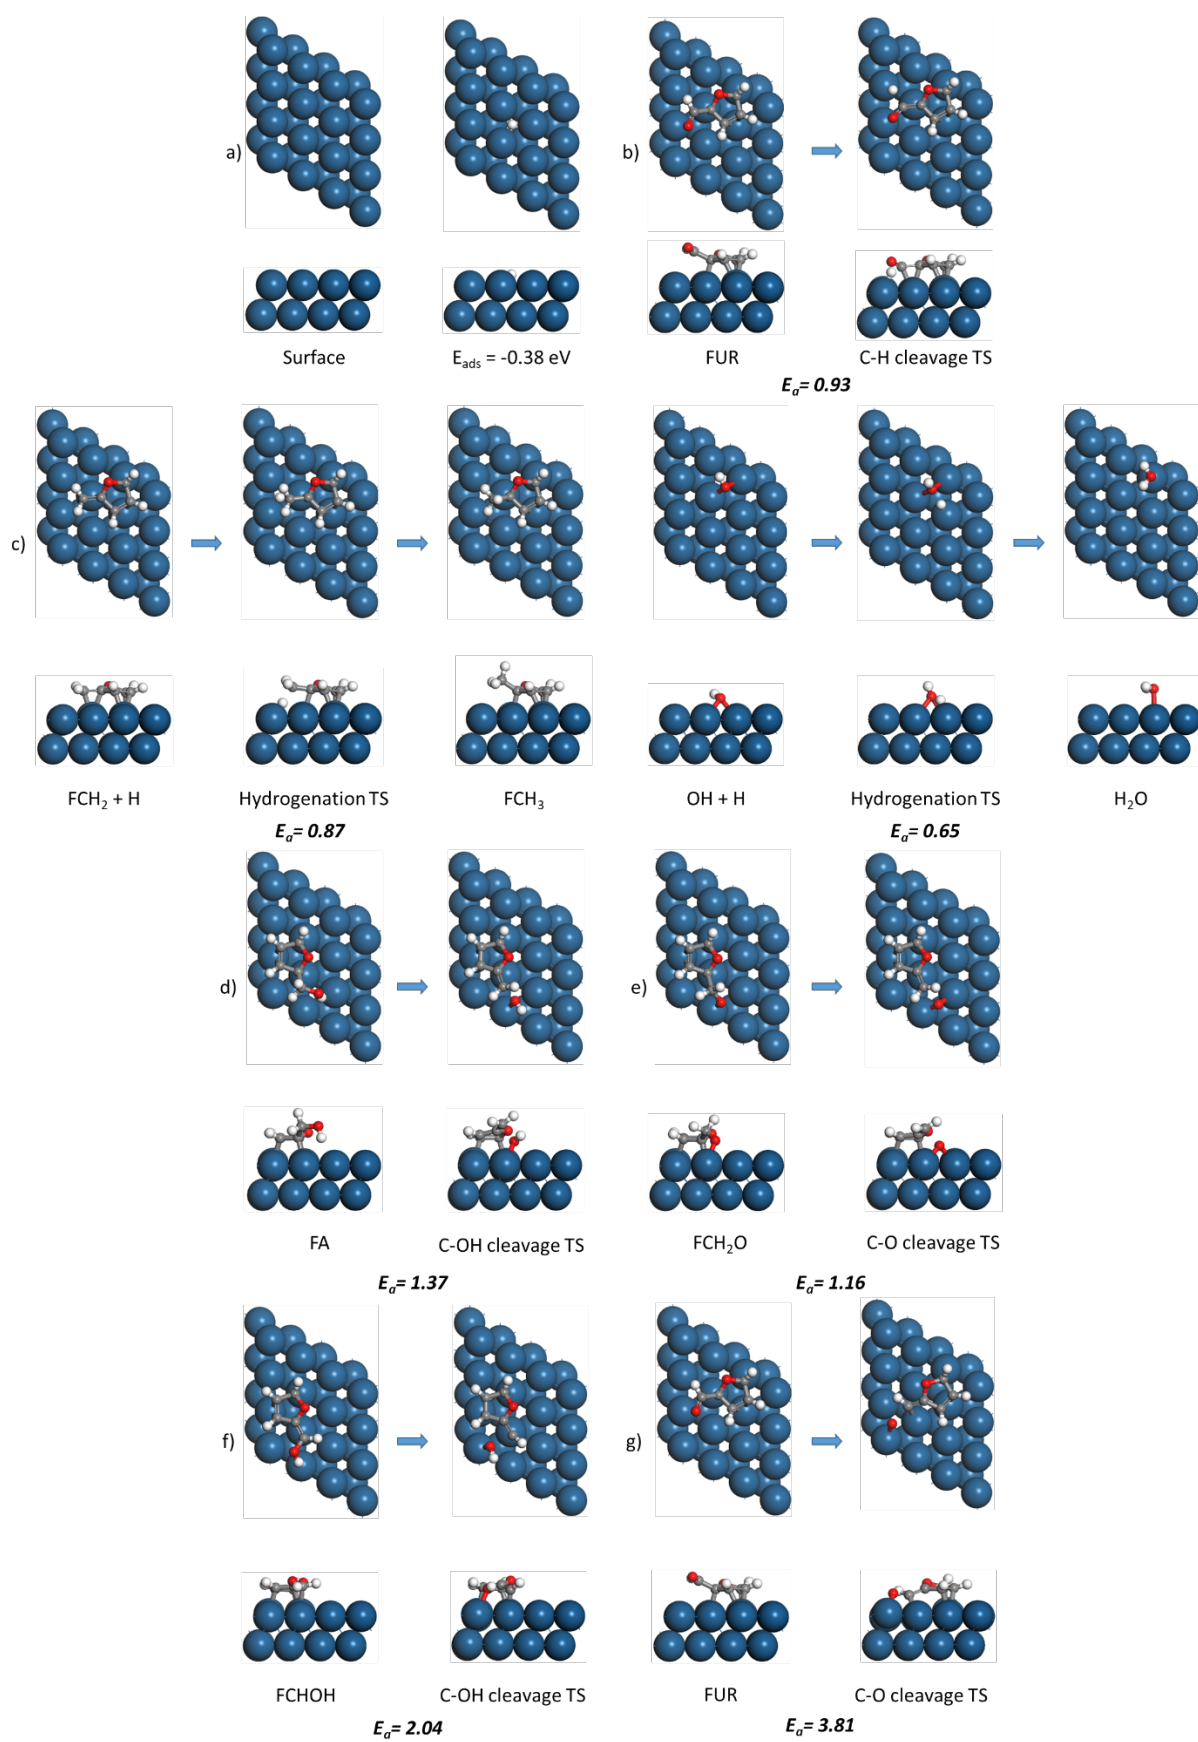

**Figure S9:** Key steps of furfural hydrodeoxygenation reaction structures on Pt(111). a) shows the Pt(111) surface with single hydrogen atom adsorption energy. b) shows the initial C-H cleavage barrier of furfural. c) shows the hydrogenation barriers of FCH<sub>2</sub> to 2-methylfuran and hydroxyl to water. d), e), f) and g) shows the C-O cleavage barrier of furfuryl alcohol, FCH<sub>2</sub>O, FCHOH, and furfural respectively.
